# 1 Cellular and structural basis of synthesis of the unique 2 intermediate dehydro-F<sub>420</sub>-O in mycobacteria

3 Rhys Grinter<sup>1,2\*</sup>, Blair Ney<sup>1,3,4</sup>, Rajini Brammananth<sup>1,2</sup>, Christopher K. Barlow<sup>5,6</sup>, Paul R.F.  
4 Cordero<sup>1,2</sup>, David L. Gillett<sup>1,2</sup>, Thierry Izoré<sup>5</sup>, Max J. Cryle<sup>5</sup>, Liam K. Harold<sup>7</sup>, Gregory M. Cook<sup>7</sup>,  
5 George Taiaroa<sup>8</sup>, Deborah A. Williamson<sup>8</sup>, Andrew C. Warden<sup>3</sup>, John G. Oakeshott<sup>3</sup>, Matthew  
6 C. Taylor<sup>3</sup>, Paul K. Crellin<sup>1,2</sup>, Colin J. Jackson<sup>4</sup>, Ralf B. Schittenhelm<sup>5,6</sup>, Ross L. Coppel<sup>2</sup>, Chris  
7 Greening<sup>1,2\*</sup>

8  
9 <sup>1</sup> School of Biological Sciences, Monash University, Clayton, VIC 3800, Australia

10 <sup>2</sup> Department of Microbiology, Monash Biomedicine Discovery Institute, Monash University,  
11 Clayton, VIC 3800, Australia

12 <sup>3</sup> CSIRO Land & Water, Canberra, ACT 2601, Australia

13 <sup>4</sup> Research School of Chemistry, Australian National University, Canberra, ACT 0200, Australia

14 <sup>5</sup> Department of Biochemistry, Monash Biomedicine Discovery Institute, Monash University,  
15 Clayton, VIC 3800, Australia

16 <sup>6</sup> Monash Proteomics & Metabolomics Facility, Monash Biomedicine Discovery Institute,  
17 Monash University, Clayton, VIC 3800, Australia

18 <sup>7</sup> Department of Microbiology and Immunology, University of Otago, Dunedin 9016, New  
19 Zealand

20 <sup>8</sup> Peter Doherty Institute for Infection and Immunity, University of Melbourne, VIC 3000,  
21 Australia

22

23 \* Correspondence can be addressed to:

24 Associate Professor Chris Greening ([chris.greening@monash.edu](mailto:chris.greening@monash.edu)), School of Biological  
25 Sciences, Monash University, Clayton, VIC 3800, Australia

26 Doctor Rhys Grinter ([rhys.grinter@monash.edu](mailto:rhys.grinter@monash.edu)), School of Biological Sciences, Monash  
27 University, VIC 3800

28 **Abstract**

29 F<sub>420</sub> is a low-potential redox cofactor used by diverse bacteria and archaea. In mycobacteria,  
30 this cofactor has multiple roles, including adaptation to redox stress, cell wall biosynthesis, and  
31 activation of the clinical antitubercular prodrugs pretomanid and delamanid. A recent  
32 biochemical study proposed a revised biosynthesis pathway for F<sub>420</sub> in mycobacteria; it was  
33 suggested that phosphoenolpyruvate served as a metabolic precursor for this pathway, rather  
34 than 2-phospholactate as long proposed, but these findings were subsequently challenged. In  
35 this work, we combined metabolomic, genetic, and structural analyses to resolve these  
36 discrepancies and determine the basis of F<sub>420</sub> biosynthesis in mycobacterial cells. We show that,  
37 in whole cells of *Mycobacterium smegmatis*, phosphoenolpyruvate rather than 2-  
38 phospholactate stimulates F<sub>420</sub> biosynthesis. Analysis of F<sub>420</sub> biosynthesis intermediates  
39 present in *M. smegmatis* cells harboring genetic deletions at each step of the biosynthetic  
40 pathway confirmed that phosphoenolpyruvate is then used to produce the novel precursor  
41 compound dehydro-F<sub>420</sub>-O. To determine the structural basis of dehydro-F<sub>420</sub>-O production, we  
42 solved high-resolution crystal structures of the enzyme responsible (FbiA) in apo, substrate,  
43 and product bound forms. These data show the essential role of a single divalent cation in  
44 coordinating the catalytic pre-complex of this enzyme and demonstrate that dehydro-F<sub>420</sub>-O  
45 synthesis occurs through a direct substrate transfer mechanism. Together, these findings  
46 resolve the biosynthetic pathway of F<sub>420</sub> in mycobacteria and have significant implications for  
47 understanding the emergence of antitubercular prodrug resistance.

48

49

50

51

52

53

54

55

## 56 Introduction

57 Factor 420 ( $F_{420}$ ) is a deazaflavin cofactor that mediates diverse redox reactions in bacteria and  
58 archaea (1). Chemically,  $F_{420}$  consists of a redox-active deazaflavin headgroup (derived from  
59 the chromophore Fo) that is conjugated to a variable-length polyglutamate tail via a  
60 phosphoester linkage (2). While the Fo headgroup of  $F_{420}$  superficially resembles flavins (e.g.  
61 FAD, FMN), three chemical substitutions in the isoalloxazine ring give it distinct chemical  
62 properties more reminiscent of nicotinamides (e.g. NADH, NADPH) (1). These include a low  
63 standard potential (-350 mV) and obligate two-electron (hydride) transfer chemistry (3, 4). The  
64 electrochemical properties of  $F_{420}$  make it ideal to reduce a wide range of otherwise  
65 recalcitrant organic compounds (5-7). Diverse prokaryotes are known to synthesize  $F_{420}$ , but  
66 the compound is best characterised for its roles in methanogenesis in archaea, antibiotic  
67 biosynthesis in streptomycetes, and metabolic adaptation of mycobacteria (1, 8-11). In  
68 mycobacteria,  $F_{420}$  is involved in a plethora of processes: central carbon metabolism, cell wall  
69 synthesis, recovery from dormancy, resistance to oxidative stress, and inactivation of certain  
70 bactericidal agents (7, 12-14). In the human pathogen *Mycobacterium tuberculosis*,  $F_{420}$  is also  
71 critical for the reductive activation of the newly approved clinical antitubercular prodrugs  
72 pretomanid and delamanid (15-17).

73 Following the elucidation of the chemical structure of  $F_{420}$  in the 1970s, the  $F_{420}$  biosynthesis  
74 pathway in archaea was determined through a combination of in situ biochemistry and  
75 recombinant protein analysis (1, 2). Described briefly, the deazaflavin fluorophore Fo is  
76 synthesized through condensation of 5-amino-6-ribitylamino-2,4(1H,3H)-pyrimidinedione and  
77 L-tyrosine by the SAM-radical enzymes CofG and CofH (18). The putative enzyme CofB  
78 synthesizes 2-phospholactate (2PL), which links Fo to the glutamate tail of mature  $F_{420}$  (19).  
79 Subsequently, the nucleotide transferase CofC condenses 2PL with GTP to form the reactive  
80 intermediate L-lactyl-2-diphospho-5'-guanosine (LPPG) (20). The phosphotransferase CofD  
81 then transfers 2PL from LPPG to Fo, leading to the formation of  $F_{420}$ -O (i.e.  $F_{420}$  with no  
82 glutamate tail) (21). Finally, the GTP-dependent glutamate ligase CofE adds a variable-length  
83  $\gamma$ -linked glutamate tail to produce mature  $F_{420}$  (22, 23). With the exception of the putative  
84 lactate kinase CofB, the enzymes responsible for  $F_{420}$  biosynthesis in archaea have been  
85 identified and characterized to varying extents (1). Crystal structures have been obtained for  
86 CofC, CofD and CofE from methanogenic archaea, providing some insight into how these

87 enzymes function, but questions surrounding their catalytic mechanisms remain unresolved  
88 (23-25). For example, the crystal structure of CofD from *Methanosarcina mazei* was solved in  
89 the presence of Fo and GDP; however, no divalent cation(s) required for catalysis were present  
90 in the structure and the ribosyl tail group of Fo, which receives the 2PL moiety from LPPG was  
91 disordered, precluding an understanding of the catalytic mechanism of this step in F<sub>420</sub>  
92 biosynthesis (21, 25).

93 It was assumed that the biosynthesis pathway for archaeal F<sub>420</sub> was generic to all F<sub>420</sub> producing  
94 organisms (1). However, recent studies have shown that the structure and biosynthesis of F<sub>420</sub>  
95 varies between producing organisms (24, 26). F<sub>420</sub> produced by the proteobacterial fungal  
96 symbiont *Paraburkholderia rhizoxinica* was found to incorporate 3-phospho-D-glycerate (3PG)  
97 in the place of 2PL, producing a chemically distinct F<sub>420</sub> (26). In parallel, analysis of purified F<sub>420</sub>  
98 biosynthesis enzymes from mycobacteria indicated that the central glycolytic and  
99 gluconeogenic intermediate phosphoenolpyruvate (PEP), rather than 2PL, is a precursor for  
100 F<sub>420</sub> biosynthesis (24). In contrast to *P. rhizoxinica*, in mycobacteria, mature F<sub>420</sub> is chemically  
101 analogous to that produced by archaea (27). All mycobacterial species possess the four  
102 enzymes required for F<sub>420</sub> biosynthesis. However, as these enzymes catalyze reactions distinct  
103 to their archaeal homologues, the following alternative nomenclature is applied compared to  
104 the archaeal enzymes: FbiD (homologous to CofC), FbiC (a single protein with domains  
105 homologous to CofG and CofH), FbiA (homologous to CofD) and FbiB (N-terminal domain  
106 homologous to CofE) (8). In addition to its CofE-like domain, FbiB possesses an FMN-binding C-  
107 terminal domain and biochemical evidence suggests it is responsible for the reduction of the  
108 moiety derived from PEP (24, 28).

109 However, several findings have cast doubt on whether the proposed revised biosynthesis  
110 pathway of F<sub>420</sub> is physiologically relevant. The predicted use of PEP in F<sub>420</sub> biosynthesis in  
111 mycobacteria would lead to the formation of the oxidized intermediate compound dehydro-  
112 F<sub>420</sub>-O (DH-F<sub>420</sub>-O). The production of DH-F<sub>420</sub>-O was detected in a coupled enzyme assay  
113 containing purified FbiD and FbiA with PEP supplied as the substrate but has yet to be detected  
114 in mycobacterial cells (24). The study also showed that CofC from *Methanocaldococcus*  
115 *jannaschii* utilized PEP rather than 2PL for F<sub>420</sub> biosynthesis (24), leading the authors to  
116 conclude that PEP is the general precursor for F<sub>420</sub> biosynthesis in prokaryotes. However, these  
117 findings contradict previous analysis of CofC activity in *M. jannaschii* cell lysates (19, 21), as

118 well as recent biochemical analysis, which shows that CofC preferentially utilizes 2PL for F<sub>420</sub>  
119 biosynthesis (26). In turn, these findings cast doubt on whether PEP is truly the preferred  
120 substrate for mycobacterial F<sub>420</sub> biosynthesis and whether DH-F<sub>420</sub>-O is the physiological  
121 intermediate in this pathway.

122 In this work, we first resolved this ambiguity by analyzing the F<sub>420</sub> biosynthetic pathway in *M.*  
123 *smegmatis* in whole cells. We demonstrate that PEP, not 2PL, is the substrate for F<sub>420</sub>  
124 biosynthesis in mycobacterial cells, suggesting that divergent biosynthesis pathways are  
125 utilized to generate F<sub>420</sub> in different prokaryotic species. Consistent with this result, we  
126 determine that DH-F<sub>420</sub>-O is the physiological intermediate for F<sub>420</sub> biosynthesis in  
127 mycobacteria, and is present in high quantities in cells lacking FbiB and comes bound to FbiA  
128 purified from *M. smegmatis*. Furthermore, to elucidate the catalytic mechanism for the  
129 formation of the novel intermediate DH-F<sub>420</sub>-O, we determined the crystal structure of FbiA in  
130 the presence and absence of its substrate and product compounds. These data resolve long-  
131 standing questions about the catalytic mechanism of FbiA and CofD in F<sub>420</sub> biosynthesis.  
132 Moreover, they provide a target for therapeutic intervention through the inhibition of F<sub>420</sub>  
133 biosynthesis, as well as insight into potential mechanisms for the emergence of delamanid and  
134 pretomanid drug resistance through mutations in FbiA.

135

## 136 Results

### 137 Phosphoenolpyruvate is the substrate for the biosynthesis of F<sub>420</sub> in mycobacterial cells

138 To determine whether PEP or 2PL is the substrate for F<sub>420</sub> biosynthesis in mycobacteria (Figure  
139 1A), we spiked clarified cell lysates from *M. smegmatis* with GTP and either PEP or 2PL, and  
140 monitored the synthesis of new F<sub>420</sub> species through HPLC coupled with fluorescence detection.  
141 In cell lysates spiked with PEP, a species corresponding to F<sub>420</sub>-O in the F<sub>420</sub> standard was  
142 present, which was absent from both the untreated and 2PL spiked lysates (Figure 1B). The  
143 formation of this F<sub>420</sub>-O-like species in PEP spiked lysates corresponded to a decrease in Fo  
144 levels, suggesting that synthesis of DH-F<sub>420</sub>-O from PEP is occurring (Figure 1B). These data  
145 strongly suggest that PEP, not 2PL, is the precursor for F<sub>420</sub> biosynthesis in *M. smegmatis*.

146 While the lysate spiking experiment establishes that PEP is specifically utilised for F<sub>420</sub> synthesis  
147 in *M. smegmatis*, the fluorescent detection method utilised does not chemically differentiate  
148 between F<sub>420</sub>-O or DH-F<sub>420</sub>-O. As PEP is utilised, it would be expected that DH-F<sub>420</sub>-O is produced.  
149 However, DH-F<sub>420</sub>-O may be rapidly reduced to F<sub>420</sub>-O rather than accumulating in the cell. To  
150 confirm the synthesis of the DH-F<sub>420</sub>-O in *M. smegmatis*, we created isogenic deletions in the  
151 four F<sub>420</sub> biosynthesis genes: *fbiD*, *fbiC*, *fbiA*, and *fbiB* (Figure 2A). The genome sequences of  
152 these deletion strains were determined, confirming clean deletion with no secondary  
153 mutations present. We then detected the deazaflavin species present in clarified cell lysates  
154 from these strains using fluorescence-coupled HPLC and LC-MS. As expected, based on the  
155 proposed function of these enzymes, mature F<sub>420</sub> was only detected in wild-type cell lysates  
156 and possessed a polyglutamate tail length of three to eight (Figure 2B, Figure S1). Fo was  
157 detected in the wildtype and all mutants with the exception of  $\Delta fbiC$ , consistent with the  
158 function of this enzyme in the synthesis of the Fo-deazaflavin moiety (Figure 2A, C, Figure S1).  
159 The proposed biosynthetic intermediate DH-F<sub>420</sub>-O was detected only in cell lysates of the  $\Delta fbiB$   
160 strain (Figure 2D, Figure S1). No F<sub>420</sub>-O was detected in wildtype or mutant strains.

161 The presence of DH-F<sub>420</sub>-O (and absence of detectable F<sub>420</sub>-O) in whole cells demonstrates that  
162 it is the central physiological intermediate in mycobacterial F<sub>420</sub> biosynthesis. This also lends  
163 support to the biochemical and cellular assays indicating that PEP, not 2PL, is the substrate for  
164 this pathway in mycobacteria. Furthermore, in addition to its role as the F<sub>420</sub> glutamyl-ligase,  
165 structural and biochemical analysis suggests that FbiB is responsible for the reduction of DH-  
166 F<sub>420</sub>-O (24, 28). The detection of DH-F<sub>420</sub>-O only in the  $\Delta fbiB$  strain demonstrates that this  
167 intermediate is rapidly turned over in the cell and supports the hypothesis that FbiB and not  
168 another enzyme performs this step in mycobacterial F<sub>420</sub> biosynthesis.

169

#### 170 **FbiA co-purifies with its product dehydro-F<sub>420</sub>-O**

171 In order to determine the catalytic mechanism for the synthesis of the novel intermediate DH-  
172 F<sub>420</sub>-O, we overexpressed and purified FbiA from *M. smegmatis*. Purified FbiA from *M.*  
173 *smegmatis* possessed a light-yellow color, indicating co-purification with a product or substrate  
174 molecule (Figure S2A). The nature of this substrate was investigated using fluorescence  
175 spectroscopy, with purified FbiA found to have a broad absorbance peak at 400 nm and a

176 corresponding emission peak at 470 nm (Figure S2B), which is consistent with the presence of  
177 a deazaflavin with a protonated 8-OH group (16). We then utilized LC/MS to identify the  
178 deazaflavin species associated with FbiA and found the major species was its product DH-F<sub>420</sub>-  
179 0 (Figure S2C). In addition, significant quantities of mature F<sub>420</sub> species were also associated  
180 with FbiA, suggesting that it also binds to mature F<sub>420</sub> present in the cytoplasm (Figure S2C).

181

## 182 The crystal structure of FbiA reveals an active site with open and closed states

183 In order to resolve the catalytic mechanism of DH-F<sub>420</sub>-0 synthesis, purified FbiA was  
184 crystallized and its structure was determined at 2.3 Å by X-ray crystallography (Table S1). FbiA  
185 crystallized as a dimer mediated by the interaction of three α-helices and a β-sheet (Figure 3A).  
186 This dimer is predicted to be stable by the protein-interaction prediction program PISA (29)  
187 and the molecular weight of FbiA determined by SEC-MALS shows it forms a dimer in solution  
188 (Table S2, Figure S2D). The structure of CofD from *M. mazei*, a homologous enzyme that  
189 instead utilizes LPPG derived from 2PL as its substrate, also crystallised as a dimer with an  
190 analogous interface to FbiA (25). Despite the copurification of FbiA with DH-F<sub>420</sub>-0, only weak  
191 electron density attributable to DH-F<sub>420</sub>-0 was observed in the catalytic site of molecule B (Mol.  
192 B) of the FbiA dimer (Figure S3). To obtain the product bound structure of FbiA, DH-F<sub>420</sub>-0 was  
193 purified from recombinant FbiA and soaked into existing crystals of FbiA. Using this procedure,  
194 electron density clearly attributable to the Fo and phosphate moieties of DH-F<sub>420</sub>-0 was  
195 observed in Mol. B of FbiA, allowing modelling of the product bound structure (Figure S3).  
196 Density for the carbonyl group of DH-F<sub>420</sub>-0 was less well resolved, suggesting it exists in  
197 multiple conformations in product-bound FbiA (Figure S3). Similarly, FbiA crystals were soaked  
198 with Fo and GDP, individually or in combination, and structures of substrate-bound FbiA were  
199 determined (Figure S3, Table S1).

200 Comparison of the Mol. A and B from the FbiA dimer reveals the active site of the enzyme in  
201 distinct open and closed conformations (Figure 3). In Mol. A, the active site is locked in an open  
202 state due to participation of an extended loop (amino acids 239-254) in crystal packing (Figure  
203 3B). In this open state, FbiA has a lower apparent substrate affinity, with no density attributable  
204 to Fo or DH-F<sub>420</sub>-0 and only weak density for GDP observed in the respective co-crystal  
205 structures (Figure S3). In contrast, in Mol. B the extended loop (AA 239-254) is partially

206 disordered in the non-GDP bound structures and encloses GDP in the active site in GDP-bound  
207 structures (Figure 3C). In Mol. B, additional conformational changes are observed in amino  
208 acids 69-102 and a subdomain composed of amino acids 145-189, creating the binding pocket  
209 for the deazaflavin moiety of Fo or DH-F<sub>420</sub>-O, which is not present in Mol. A (Figure 3B, C). The  
210 conformational differences observed between Mol. A and Mol. B are consistent in the apo,  
211 substrate and product-bound structures, demonstrating they are not substrate-induced and  
212 are likely representative of conformational differences of the enzyme in solution.

213

### 214 **The crystal structures of FbiA in substrate- and product-bound forms provide mechanistic** 215 **insight into dehydro-F<sub>420</sub>-O synthesis**

216 The resolution of the structure of FbiA in the presence of its substrate and product compounds  
217 provides key insights into the catalytic mechanism of this unique phosphotransferase. It was  
218 previously established that FbiA and its archaeal homologue CofD require the presence of the  
219 divalent cation Mg<sup>2+</sup> for activity (21, 24). However, it remained to be resolved whether Mg<sup>2+</sup> is  
220 bound stably in the FbiA active site during catalysis and the mode of coordination of the ion(s).  
221 In the GDP-bound structures of FbiA, a single metal ion was present in the active site of Mol. B  
222 of FbiA (Figure 4A, Figure S4A, Figure S5). Interestingly, no metal ion was observed in Mol. A,  
223 despite the presence of GDP, suggesting that its recruitment is conformation-dependent  
224 (Figure S2). As calcium acetate is present at high concentration (0.2 M) in the crystallization  
225 condition, and magnesium is absent, we modelled this ion as Ca<sup>2+</sup>. While the activity of FbiA in  
226 the presence of Ca<sup>2+</sup> has not been tested, it has been shown to be interchangeable with Mg<sup>2+</sup>  
227 in some phosphotransferase and phosphohydrolase reactions (30, 31). In the GDP-only  
228 structure, the Ca<sup>2+</sup> ion is directly coordinated by aspartates 45 and 57, an oxygen atom of the  
229 β-phosphate of GDP, two H<sub>2</sub>O molecules, and a glycerol molecule (Figure S4B). Aspartate 57  
230 exhibits bidentate coordination of the Ca<sup>2+</sup> ion leading to a coordination number of seven with  
231 distorted octahedral geometry.

232 In the GDP and Fo bound structure, the coordination of Ca<sup>2+</sup> is analogous to the GDP-only  
233 structure. However, the glycerol molecule and one of the H<sub>2</sub>O molecules observed in the GDP  
234 only structure are displaced by the ribosyl chain of Fo, resulting in a coordination number of  
235 six with octahedral geometry (Figure 4B, Figure S4B). The terminal hydroxyl group of Fo is



236 significantly closer to the  $\text{Ca}^{2+}$  ion (2.6 Å) and to the  $\beta$ -phosphate of GDP (2.8 Å from O, and 3.0  
237 Å from P) than the coordinating hydroxyl of glycerol, which is not within bonding distance of  
238 GDP. These bond distances between the hydroxyl of Fo and GDP, as well as the central  
239 orientation of the hydroxyl of Fo towards the  $\beta$ -phosphate of GDP, place it in an ideal position  
240 to act as the acceptor substrate for the transfer of PEP catalysed by FbiA (Figure 4B). In the Fo  
241 and DH-F<sub>420</sub>-O bound structures, no density corresponding to a  $\text{Ca}^{2+}$  ion was observed (Figure  
242 4C, Figure S4C). This suggests that binding of FbiA to its catalytic metal ion is contingent on  
243 complex formation with enolpyruvyl-diphospho-5'-guanosine (EPPG) (Figure 2A), which is  
244 substituted for GDP in our structures due to the instability of the F<sub>420</sub> pathway intermediate  
245 (24). The ability of FbiA to bind Fo in the absence of GDP and  $\text{Ca}^{2+}$  suggests that substrate  
246 binding to FbiA is non-sequential; however, recruitment of all three components is required  
247 for catalysis to proceed.

248 Based on these structural data and previous biochemical characterization of FbiA and CofD we  
249 propose a catalytic mechanism for synthesis of the DH-F<sub>420</sub>-O (Figure 4E) (21, 25). Our structural  
250 data agree with previous work that suggests that CofD does not form a covalent intermediate  
251 as part of the reaction mechanism (21), but rather the reaction proceeds through direct  
252 nucleophilic attack of the  $\beta$ -phosphate of EPPG by the terminal hydroxyl of Fo. This leads to  
253 the formation of a pentavalent transition state between Fo and EPPG that is stabilized by the  
254 catalytic metal ion (Figure 4E). In order for the hydroxyl group of Fo to perform nucleophilic  
255 attack, it needs to be activated through deprotonation. The carboxylic acid group of EPPG is a  
256 likely candidate for this activation, as it is the only acidic group in close proximity to the  
257 hydroxyl group of Fo when EPPG is modelled in the FbiA structure in place of GDP (Figure 4D).  
258 Additionally, the activation of Fo by the carboxylic acid group of EPPG would provide FbiA with  
259 substrate specificity for EPPG over GDP and GTP. Following the formation of the pentavalent  
260 reaction intermediate, GMP would act as the leaving group, leading to the formation of the  
261 phosphodiester bond between PEP and Fo and the formation of DH-F<sub>420</sub>-O (Figure 4E).

262

## 263 Discussion

264 Integrating these findings with other recent literature, it is now clear that the substrate for the  
265 initial stage of F<sub>420</sub> tail biosynthesis differs between F<sub>420</sub> producing organisms (19, 24, 26). We  
266 definitively show here that, in mycobacteria, PEP is the substrate for F<sub>420</sub> biosynthesis,

267 resolving the ambiguity in the literature (24, 26). In contrast, in the archaeal and  
268 proteobacterial species that have been analysed, 2PL and 3PG respectively are preferentially  
269 utilized (19, 26). This divergent substrate utilization occurs despite the enzymes responsible  
270 for this stage of synthesis (FbiD/CofC and FbiA/CofD) sharing a common evolutionary history  
271 (8). This suggests that the substrate specificity of these enzymes has evolved in response to  
272 selection to maintain compatibility between the substrate used for F<sub>420</sub> biosynthesis and what  
273 is available in the cellular metabolite pool. Both PEP and 3PG are intermediates in central  
274 metabolic pathways, including glycolysis, whereas 2PL is not thought to be present in  
275 significant quantities in most organisms (24, 32, 33). This makes PEP and 3PG compatible  
276 substrates for F<sub>420</sub> biosynthesis in *Mycobacterium* spp. and *P. rhizoxinica* respectively, with the  
277 specifics of cellular metabolism of each organism likely dictating which compound was selected  
278 for F<sub>420</sub> biosynthesis. In contrast, in the archaeon *Methanobacterium thermoautotrophicum*,  
279 2PL is present at micromolar concentrations (19). However, in archaeal species, it remains to  
280 be determined how 2PL is synthesized and whether this compound plays a wider role as a  
281 general metabolite beyond F<sub>420</sub> biosynthesis.

282

283 Phylogenetic analysis of FbiD/CofC and FbiA/CofD suggests that these proteins were  
284 horizontally transferred from bacteria and archaea (8). Based on this analysis, it is curious that  
285 mycobacteria reduce DH-F<sub>420</sub>-O produced via PEP to F<sub>420</sub>, rendering it chemically identical to  
286 that produced with 2PL. The redox properties of the deazaflavin group of DH-F<sub>420</sub> and F<sub>420</sub> are  
287 identical and chemically the molecules are very similar, posing the question: why is reduction  
288 of DH-F<sub>420</sub>-O is required? A plausible explanation is that actinobacteria originally utilized 2PL  
289 for F<sub>420</sub> synthesis, with a switch to PEP occurring at a later stage in evolution. As a result, the  
290 F<sub>420</sub>-dependent enzymes present in mycobacteria evolved to recognize the non-planar 2PL  
291 moiety of F<sub>420</sub>, requiring reduction of DH-F<sub>420</sub> to maintain compatibility after the substrate  
292 switch. Previous structural and biochemical analysis suggests the C-terminal domain of  
293 mycobacterial FbiB is responsible for the reduction of DH-F<sub>420</sub>-O (24, 28). This domain is present  
294 in all mycobacterial species, but is absent from FbiB/CofE in most other F<sub>420</sub> producing  
295 organisms, including *M. mazei* and *P. rhizoxinica*, that produce F<sub>420</sub> through pathways that do  
296 not require this reductive step (8, 26). This conclusion is supported by our cellular analysis of

297 F<sub>420</sub> biosynthesis in *M. smegmatis*, which shows that DH-F<sub>420</sub>-O accumulates in the  $\Delta$ *fbtB* strain  
298 (Figure 2A, D).

299

300 The structural analysis of FbiA that we present in this work provides unprecedented insight  
301 into the catalytic mechanism for the novel phosphotransferase reaction employed at this step  
302 in F<sub>420</sub> biosynthesis. The crystal structure of FbiA shows that this enzyme employs a flexible  
303 active site to capture Fo and EPPG, precisely positioning them for catalysis. Determination of  
304 the fully resolved FbiA substrate complex, in the presence of a single catalytic metal ion,  
305 provides a clear picture of the mechanism of catalysis of this enzyme. In this structure, the  
306 terminal hydroxyl group of Fo is ideally positioned for nucleophilic attack of the  $\beta$ -phosphate  
307 of EPPG, strongly suggesting that DH-F<sub>420</sub>-O biosynthesis occurs through direct transfer of PEP  
308 to Fo, via a pentavalent phosphate intermediate that is stabilized by the catalytic metal ion.  
309 The positioning of the Fo terminal hydroxyl group in our structure in relation to EPPG is  
310 strikingly similar to that of the attacking ribose in the final step in DNA ligation by T4 ligase,  
311 recently resolved by X-ray crystallography (34). This is consistent with both reactions resulting  
312 in the formation of a phosphodiester bond through direct nucleophilic attack of a  
313 diphosphonucleoside intermediate. As no acidic side chains are present in proximity the  
314 terminal hydroxyl of Fo in our structure of FbiA, it is likely that deprotonation of this group for  
315 nucleophilic attack is EPPG induced, possibly by the PEP carboxyl moiety. These data are also  
316 consistent with biochemical analysis of CofD from *M. magerit*, which did not detect the  
317 formation of a catalytic reaction intermediate during the synthesis of F<sub>420</sub>-O (21).

318

319 The resolution of the F<sub>420</sub> biosynthesis pathway also has implications for tuberculosis  
320 treatment. It has been proposed that F<sub>420</sub> biosynthesis represents a promising target for the  
321 development of drugs for the treatment of *M. tuberculosis* given the pleiotropic role of this  
322 cofactor and its absence from human cells. Given FbiA mediates the key step in F<sub>420</sub>  
323 biosynthesis, the structural insights into FbiA catalysis provide a basis for the development of  
324 inhibitory compounds targeting F<sub>420</sub> biosynthesis. In addition, loss-of-function of FbiA causes  
325 resistance to the clinical nitroimidazole prodrugs delamanid and pretomanid, both of which  
326 are activated by the F<sub>420</sub>H<sub>2</sub>-dependent reductase Ddn (15, 17, 35). Hence, the structural and

327 mechanistic insights provided here will enable prediction of which substitutions are likely to  
328 impair or inactivate FbiA, thus conferring resistance to these compounds.

329

## 330 **Methods**

### 331 **Creation of *M. smegmatis* F<sub>420</sub> biosynthesis mutant strains**

332 *M. smegmatis* MSMEG\_5126 was deleted in wild-type *M. smegmatis* mc<sup>2</sup> 155 using a two-step  
333 allelic replacement strategy. Two 0.8 kb fragments containing sequences from the left and right  
334 flanking regions of the MSMEG\_5126 (*fbiC*) gene were cloned as separate constructs and later  
335 combined to make the deletion construct. The left flanking fragments were amplified using  
336 ProofStart DNA polymerase (Qiagen) with primers MSMEG\_5126left and MSMEG\_5126leftrev,  
337 and the PCR product was subsequently cloned into the SacI/BamHI sites of pUC18, creating  
338 plasmid pUC-MSMEG\_5126left (primers described in [Table S3](#)). A 0.8 kb fragment containing  
339 sequence from the right side of MSMEG\_5126 was amplified using primers MSMEG\_5126right  
340 and MSMEG\_5126rightrev and cloned into the XbaI/BamHI sites of pUC18, creating plasmid  
341 pUC-MSMEG\_5126right. The right flanking sequence was then excised from pUC-  
342 MSMEG\_5126right using XbaI/SacI and subcloned into XbaI/SacI-digested pUC-  
343 MSMEG\_5126left, fusing the left and right flanking sequences to create plasmid pUC-  
344 ΔMSMEG\_5126.

345 The 1.6 kb fused insert was then liberated using XbaI/SacI and subcloned into XbaI/SacI-digested  
346 pMSS vector (36), a suicide plasmid for *M. smegmatis* that contains streptomycin selection and  
347 sucrose contra-selection markers. The resultant plasmid, pMSS:ΔMSMEG\_5126, was  
348 sequenced then electroporated into electrocompetent *M. smegmatis* mc<sup>2</sup>155 cells, using an  
349 ECM 630 electroporator (BTX), selecting for streptomycin-resistant colonies (30 μg/ml), which  
350 were then screened for sensitivity to 10% (w/v) sucrose. DNA from confirmed streptomycin-  
351 resistant, sucrose-sensitive colonies was PCR amplified using primer pair MSMEG\_5126screen-  
352 F and MSMEG\_5126KOright-R. The resultant PCR product was confirmed by DNA sequencing.

353 A confirmed single crossover (SCO) strain was grown for three days in the absence of antibiotic  
354 selection, serially diluted and plated on LB plates containing 10% (w/v) sucrose to select for  
355 potential double crossover (DCO) strains (*ie.* MSMEG\_5126 deletion mutants). Genomic DNA  
356 was extracted from sucrose-resistant, streptomycin-sensitive clones, digested using ClaI/NcoI

357 and subjected to Southern blot analysis using an MSMEG\_5126 specific probe to confirm  
358 deletion of the MSMEG\_5126 gene. For Southern blotting analysis 2 µg of gDNA was digested  
359 with appropriate restriction enzymes (NEB) at 37 °C for 16 hours. Purified samples and  
360 digoxigenin (DIG)-labeled, HindIII-digested λ DNA markers were separated on a 1% agarose gel  
361 followed by depurination, denaturation, neutralization, and capillary transfer onto a nylon  
362 membrane (Thermo Fisher). The membrane was then hybridized at 67 °C with a gene-specific  
363 probe prepared by DIG labelling a 3.0-kb PCR product obtained using primers  
364 MSMEG\_5126screen-R and MSMEG\_5126screen-F. Once confirmed by Southern blotting, the  
365 genome of a mutant was sequenced at The Peter Doherty Institute for Infection and Immunity  
366 at the University of Melbourne.

367 MSMEG\_1829 (*fbiB*), MSMEG\_2392 (*fbiD*) and MSMEG\_1830 (*fbiA*) deletion mutants were  
368 generated following the same methods as MSMEG\_5126, using gene-specific primer  
369 combinations (Table S3). Individual deletion mutants of *fbiA*, *fbiB* and *fbiD* were confirmed by  
370 Southern blot following digestion with PvuII and then genome sequencing.

371

#### 372 Purification of Fo, DH-F<sub>420</sub>-O and F<sub>420</sub>

373 Fo was purified from culture supernatants of *M. smegmatis* mc<sup>2</sup>155 overexpressing FbiC from  
374 *M. tuberculosis* cloned into the acetamide inducible vector pMyNT. Cells were grown at 37 °C  
375 in 7H9 media to an OD<sub>600</sub> ~3.0 before FbiC expression was induced by the addition of 0.2 %  
376 acetamide. Cells were grown for an additional 72 hours at 37 °C with shaking and supernatant  
377 was clarified by centrifugation at 10,000 x g for 20 minutes. The clarified supernatant was  
378 filtered (0.45 µM) and applied to a C18-silica column equilibrated in dH<sub>2</sub>O. Bound Fo was eluted  
379 with 20 % methanol in dH<sub>2</sub>O and the solvent was removed by vacuum evaporation. Fo was  
380 resuspended in dH<sub>2</sub>O and centrifuged (20,000 g for 20 minutes) to remove insoluble  
381 contaminants, before reapplication to a C18-silica column equilibrated in dH<sub>2</sub>O. Fo was again  
382 eluted with 20 % methanol in dH<sub>2</sub>O, vacuum evaporated and stored at -20 °C for further  
383 analysis.

384 F<sub>420</sub> was expressed and purified as previously described in *M. smegmatis* mc<sup>2</sup>4517  
385 overexpressing FbiA, FbiB, and FbiC in the expression vector pYUBDuet-FbiABC (37). Cells were  
386 grown in LB broth + 0.05% Tween 80 at 37 °C with shaking to an OD<sub>600</sub> of ~2.0 before the

387 expression of the *fbi* genes was induced with 0.2 % acetamide. Cells were grown for an  
388 additional 72 hours before harvesting by centrifugation at 10,000 × *g* for 20 minutes. Cells were  
389 resuspended in 50 mM Tris (pH 7.5) at a ratio of 10 ml of buffer per 1 gram of wet cells and  
390 lysed by autoclaving. The autoclaved cell suspension was clarified by centrifugation at 20,000  
391 × *g* for 20 minutes. The clarified supernatant was applied to a High Q Anion Exchange Column  
392 (Biorad) equilibrated in 50 mM Tris (pH 7.5). Bound species were eluted with a gradient of 0-  
393 100 % of 50 mM Tris, 1 M NaCl (pH 7.5). Fractions containing F<sub>420</sub> were identified via visible  
394 spectroscopy based on their distinctive absorbance peak at 420 nm. Fractions containing F<sub>420</sub>  
395 were pooled and applied to a C18-silica column equilibrated in dH<sub>2</sub>O. F<sub>420</sub> was eluted with 20 %  
396 methanol in H<sub>2</sub>O, vacuum evaporated and stored at -20 °C for further analysis.

397 DH-F<sub>420</sub>-0 was extracted from purified FbiA expressed in *M. smegmatis* as described below.  
398 Purified concentrated FbiA (~20 mg ml<sup>-1</sup>; prior to cleavage of the poly-histidine tag) was  
399 denatured in a buffer containing 50 mM Tris and 8 M Urea (pH 7.0). This solution containing  
400 denatured FbiA and free DH-F<sub>420</sub>-0 was applied to a nickel-agarose column, with denatured  
401 FbiA binding to the column due to its hexahis-tag and DH-F<sub>420</sub>-0 eluting in the flowthrough. The  
402 flowthrough containing DH-F<sub>420</sub>-0 was applied to a Superdex 30 10/300 column equilibrated in  
403 dH<sub>2</sub>O and eluted fractions containing DH-F<sub>420</sub>-0 were identified based on their absorbance at  
404 420 nM. DH-F<sub>420</sub>-0 containing fractions were pooled, vacuum evaporated, resuspended in 500  
405 µl of dH<sub>2</sub>O and reapplied to the Superdex 30 10/300 column equilibrated in 20 % acetonitrile  
406 in dH<sub>2</sub>O. DH-F<sub>420</sub>-0 containing fractions were then pooled, vacuum evaporated and stored at -  
407 20 °C for further analysis.

408

#### 409 **FbiA expression and purification**

410 The DNA coding sequence corresponding to FbiA from *M. smegmatis* was amplified by PCR  
411 using primers outlined in [Table S3](#), resulting in a DNA fragment with 5' NcoI and 3' HindIII sites  
412 respectively. This fragment was cloned into pMyNT by restriction enzyme cloning using the  
413 aforementioned sites, yielding pMyNTFbiAMS, which expresses FbiA with a TEV cleavable N-  
414 terminal hexahistidine tag. This vector was cloned and propagated in *E. coli* DH5α in LB  
415 media/agar with the addition of 200 µg ml<sup>-1</sup> hygromycin B. Sequence confirmed pMyNTFbiAMS  
416 was transformed into *M. smegmatis* mc<sup>2</sup>155 via electroporation, with successful transformants

417 selected for in LB + 0.05 % Tween 80 (LBT) agar in the presence of 50  $\mu\text{g ml}^{-1}$  hygromycin B.  
418 Colonies from this transformation were used to inoculate 50 ml of LBT media +50  $\mu\text{g ml}^{-1}$   
419 hygromycin B, which was grown with shaking at 37 °C until stationary phase (2-3 days). This  
420 starter culture was used to inoculate 5 liters of Terrific Broth + 0.05 % Tween 80 (TBT) giving a  
421 1:100 dilution of the starter culture. Cells were grown with shaking at 37 °C for 24 hours until  
422 approximately mid-log phase and protein production was induced through the addition of 0.2%  
423 acetamide. Cells were grown with shaking at 37 °C for an additional 72 hours before they were  
424 harvested via centrifugation at 5,000  $\times g$  for 20 minutes. Harvested cells were either lysed  
425 immediately or stored frozen at -20 °C.

426 Cells were resuspended in Ni binding buffer (20 mM HEPES, 300 mM NaCl, 20 mM imidazole;  
427 pH 7.5) at a ratio of approximately 5 ml of buffer per 1 g of wet cell mass. Lysozyme (1 mg ml<sup>-1</sup>)  
428 <sup>1</sup>), DNase (0.5 mg ml<sup>-1</sup>) and complete protease inhibitor tablets (Roche) were added and cells  
429 were lysed with a cell disruptor (Constant Systems). The cell lysate was stored on ice and  
430 clarified by centrifugation at 4 °C at 30,000  $\times g$ . Clarified lysate was passed through a column  
431 containing Ni<sup>2+</sup> agarose resin equilibrated in Ni binding buffer. The column was washed with Ni  
432 binding buffer and protein was eluted with a gradient of Ni Gradient Buffer (20 mM HEPES,  
433 300 mM NaCl, 500 mM imidazole; pH 7.5). Fractions containing FbiA were identified based on  
434 absorbance at 280 nm and their yellow color due to F<sub>420</sub> precursor co-purification and pooled.  
435 Pooled fractions were applied a Superdex S200 26/600 size exclusion chromatography (SEC)  
436 column, equilibrated with SEC buffer (20 mM HEPES, 150 mM NaCl; pH 7.5), and fractions  
437 containing FbiA were identified as above and pooled. The hexahis-tag was cleaved from  
438 purified FbiA through the addition of 0.5 mg of hexahistidine-tagged TEV protease (expressed  
439 and purified as described in reference (38)) per mg of FbiA, plus 1 mM DTT. Digestion was  
440 performed at room temperature for ~6 hours before the sample was passed through a Ni<sup>2+</sup>  
441 agarose column to remove TEV and the cleaved hexahis tag. The resulting flowthrough from  
442 this column was collected, concentrated to ~15 mg ml<sup>-1</sup> and snap frozen at -80 °C. Purified FbiA  
443 was lightly yellow in color due to co-purification with F<sub>420</sub> precursors, with a yield of 5-10 mg  
444 per litre of culture. The molecular weight of purified FbiA was determined by size exclusion  
445 coupled multiangle laser light scattering (SEC-MALS), using a Superdex S200 Increase 10/300  
446 column equilibrated in 200 mM NaCl, 50 mM Tris [pH 7.9], coupled to FPLC (Shimadzu) with  
447 MALS detection (Wyatt Technology).

448

#### 449 **FbiA crystallisation, ligand soaking and structure solution**

450 Purified FbiA was screened for crystallisation conditions using a sparse matrix approach, with  
451 approximately 600 individual conditions screened. Thin inter-grown plate crystals of FbiA  
452 formed in a number of conditions, with a condition containing 0.1 M Tris (pH 8.0), 0.2 M Ca  
453 Acetate and 20 % PEG 3350 chosen for optimization. Diffraction quality crystals were obtained  
454 by microseeding into 0.1 M Tris (pH 8.5), 0.2 M Ca Acetate and 16 % PEG 3350 +/- 20 % glycerol.  
455 Crystals grew as bunches of very thin plates and were slightly yellow in color. Crystals from  
456 conditions containing glycerol were looped and directly flash cooled to 100 K in liquid N<sub>2</sub>,  
457 providing 'apo' crystals for data collection. Crystals from non-glycerol containing wells were  
458 transferred into well solution with 20 % glycerol and either Fo, GDP, Fo and GDP or DH-F<sub>420</sub>-O.  
459 Crystals were incubated in this solution for 1-5 minutes before they were looped and flash  
460 cooled to 100 K in liquid N<sub>2</sub>.

461 Data were collected at the Australian Synchrotron, with crystals diffracting anisotropically to  
462 ~2.2 to 3.0 Å, and processed using XDS and merged using Aimless from the CCP4 package (39,  
463 40). The structure of FbiA was solved by molecular replacement using Phaser (41), with a  
464 search model derived from the structure of CofD from *M. mazei* (PDB ID: 3C3D) prepared based  
465 on the amino acid sequence for FbiA from *M. smegmatis* using sculptor from the Phenix  
466 package (41). Native and ligand soaked structures of FbiA were built and refined using Coot  
467 and phenix.refine from the Phenix package (41, 42). Structural coordinates for Fo, DH-F<sub>420</sub>-O  
468 and F<sub>420</sub> were generated using the AceDrg program within the CCP4 suite (40, 43).

469

#### 470 **LC-MS detection of F<sub>420</sub> and precursors**

471 Wild-type and Fbi mutant *M. smegmatis* mc<sup>2</sup>155 strains were grown in 20 ml of LBT media  
472 until stationary phase (2-3 days) and harvested by centrifugation at 5,000 × *g* for 20 minutes.  
473 Cells were resuspended in 2 ml of dH<sub>2</sub>O and lysed by boiling for 5 minutes before clarification  
474 by centrifugation at 25,000 × *g* for 10 minutes. The soluble fraction was then decanted for  
475 mass spectrometry analysis. Samples were analyzed by hydrophilic interaction liquid  
476 chromatography (HILIC) coupled to high-resolution mass spectrometry (LC-MS) according to a



477 previously published method (44). In brief, the chromatography utilized a 20 × 2.1 mm guard  
478 in series with a 150 × 4.6 mm analytical column (both ZIC-pHILIC, Merck). Column temperature  
479 was maintained at 25 °C with a gradient elution of 20 mM ammonium carbonate (A) and  
480 acetonitrile (B) (linear gradient time-%B as follows: 0 min-80%, 15 min-50%, 18 min-5%, 21  
481 min-5%, 24 min-80%, 32 min-80%) on a Dionex RSLC3000 UHPLC (Thermo). The flow rate was  
482 maintained at 300 µl min<sup>-1</sup>. Samples were kept at 4 °C in the autosampler and 10 µl was injected  
483 for analysis. The mass spectrometric acquisition was performed at 35,000 resolution on a Q-  
484 Exactive Orbitrap MS (Thermo) operating in rapid switching positive (4 kV) and negative (-3.5  
485 kV) mode electrospray ionization (capillary temperature 300 °C; sheath gas 50; Aux gas 20;  
486 sweep gas 2; probe temp 120 °C). The resulting LC-MS data were processed by integrating the  
487 area below the extracted ion chromatographic peaks using TraceFinder 4.1 (Thermo Scientific).  
488 All species were detected in negative mode as the singly deprotonated anion (Fo and DH-F<sub>420</sub><sup>-</sup>  
489 0) or in the case of the F<sub>420-n</sub> species the double deprotonated dianion.

490

## 491 2PL synthesis

492 2PL was chemically synthesized using the following protocol: Benzyl lactate was condensed  
493 with chlorodiphenyl phosphate in pyridine, with cooling, to give benzyldiphenylphosphoryl  
494 lactate. Hydrogenolysis of this material in 70% aqueous tetrahydrofuran over 10% Palladium  
495 on carbon (Pd-C) gave phospholactic acid as a colorless, viscous oil, which was characterized  
496 by proton, carbon and phosphorus NMR spectroscopy, and by mass spectrometry. <sup>1</sup>H NMR  
497 (DMSO-d<sub>6</sub>) δ 11.68 (br, 3H), 4.53 (m, 1H), 1.36 (d, J=6.8 Hz, 3H). <sup>13</sup>C NMR (DMSO-d<sub>6</sub>) δ 172.50  
498 (d, JP-C=0.05 Hz), 69.56 (d, JP-C=0.04 Hz), 19.27 (d, JP-C=0.04 Hz). <sup>31</sup>P NMR (DMSO-d<sub>6</sub>) δ -1.64.  
499 APCI-MS found: [M+H]<sup>+</sup>=171.1, [M-H]<sup>-</sup>=169.1.

500

## 501 Stimulation of DH-F<sub>420</sub>-0 production in spiked *M. smegmatis* cell lysates and detection of F<sub>420</sub> 502 species by HPLC

503 To detect F<sub>420</sub> synthesis in spiked *M. smegmatis* lysates, 500 ml cultures were grown in LBT for  
504 3 days at 37 °C with shaking. Cells were harvested by centrifugation at 8,000 × g for 20 min,  
505 4 °C. The pellet was resuspended in 50 ml lysis buffer (50 mM MOPS, 1 mM

506 phenylmethylsulfonyl fluoride (PMSF), 1 mM DTT, 5 mM MgCl<sub>2</sub>, 2.5 mg.ml<sup>-1</sup> lysozyme, 2.5 mg  
507 Deoxyribonuclease I). An M-110P Microfluidizer (Fluigent) pressure-lysis maintained at 4 °C  
508 was used to lyse the cells. The lysate was centrifuged at 10,000 × *g* at 4 °C for 20 min. 1 ml  
509 aliquots of lysate were spiked with either 1 mM phosphate buffer (pH 7.0) plus GTP and 2PL,  
510 or GTP and PEP. These spiked samples, along with a 'no spike' control, were incubated at 4  
511 hours at 37 °C. To terminate the reaction, the aliquots were heated at 95 °C for 20 min, then  
512 centrifuged at 16,000 × *g* for 10 min. The supernatants were filtered through a 0.22 μm PVDF  
513 filter and moved to analytical vials.

514 F<sub>420</sub> biosynthetic intermediates present in the filtered *M. smegmatis* cell lysates were analysed  
515 by separation and detection using an Agilent 1200 series HPLC system equipped with a  
516 fluorescence detector and a Poroshell 120 EC-C18 2.1 x 50 mm 2.7 μm column. The system  
517 was run at a flow rate of 0.3 ml min<sup>-1</sup> and the samples were excited at 420 nm and emission  
518 was detected at 480 nm. A gradient of two buffers were used: Buffer A, containing 20 mM  
519 ammonium phosphate, 10 mM tetrabutylammonium phosphate, pH 7.0. Buffer B, 100%  
520 acetonitrile. A gradient was run from 25% to 40% buffer B as follows: 0-1 min 25%, 1-10 min  
521 25%-35%, 10-13 min 35%, 13-16 min 35-40%, 16-19 min 40%-25%.

522

## 523 Acknowledgements

524 This research was undertaken in part using the MX2 beamline at the Australian Synchrotron,  
525 part of ANSTO, and made use of the Australian Cancer Research Foundation (ACRF) detector.  
526 We would like to thank the Monash Crystallisation Facility for their assistance with sample  
527 characterization, crystallographic screening, and optimization. pMyNT was a gift from Dr.  
528 Katherine Beckham, Dr. Annabel Parret, and Prof. Matthias Wilmanns at EMBL Hamburg. This  
529 work was supported by an ARC DECRA Fellowship (DE170100310; awarded to C.G.), an  
530 NHMRC EL2 Fellowship (APP1178715; awarded to C.G.), an NHMRC New Investigator Grant  
531 (APP5191146; awarded to C.G.), an NHMRC grant (APP1139832; awarded to C.J.J., C.G., and  
532 G.M.C.), a Monash University Science-Medicine Seed Grant (awarded to C.G. and M.J.C.), and  
533 Monash University Doctoral Scholarships (awarded to P.R.F.C. and D.G), an ARC Discovery  
534 Grant (DP180102463; awarded to R.L.C.) We would like to thank Dr. Ghader Bashiri for  
535 helpful discussions, Dr. Matthew Belousoff for his assistance in the development of F<sub>420</sub>  
536 derivative purification protocols, and Mr. Phillip Holt in the School of Chemistry, Monash  
537 University for his assistance with Fluorescence HPLC analysis.

538

## 539 Author contributions

540 C.G. and R.G. conceived and supervised the study. Different authors contributed to cellular  
541 spiking assays (B.N., C.G., C.J.J., A.W., M.C.T.), knockout construction (C.G., R.B., R.L.C., P.K.C.,  
542 G.M.C., J.G.O., M.C.T., L.K.H., G.T., D.A.W.), LC-MS analysis (C.K.B., R.G., R.S., C.G.), protein  
543 purification (R.G., C.G., B.N., P.R.F.C., C.J.J.), and crystallographic analysis (R.G., P.R.F.C.,  
544 D.L.G., C.G., T.I., M.J.C.). R.G. and C.G. analysed data and wrote the paper with input from all  
545 authors.

546

## 547 Competing financial interests

548 The authors declare no competing financial interests.

549

## 550 References

- 551 1. Greening C, *et al.* (2016) Physiology, biochemistry, and applications of F420- and F<sub>420</sub>H<sub>2</sub>-dependent redox reactions. *Microbiol. Mol. Biol. Rev.* 80(2):451-493.
- 552
- 553 2. Eirich LD, Vogels GD, & Wolfe RS (1978) Proposed structure for coenzyme F420 from  
554 *Methanobacterium*. *Biochemistry* 17(22):4583-4593.
- 555 3. Jacobson F & Walsh C (1984) Properties of 7, 8-didemethyl-8-hydroxy-5-deazaflavins  
556 relevant to redox coenzyme function in methanogen metabolism. *Biochemistry* 23(5):979-  
557 988.
- 558 4. Edmondson DE, Barman B, & Tollin G (1972) Importance of the N-5 position in flavine  
559 coenzymes. Properties of free and protein-bound 5-deaza analogs. *Biochemistry* 11(7):1133-  
560 1138.
- 561 5. Taylor MC, *et al.* (2010) Identification and characterization of two families of F420H<sub>2</sub>-  
562 dependent reductases from Mycobacteria that catalyse aflatoxin degradation. *Mol.*  
563 *Microbiol.* 78(3):561-575.
- 564 6. Li W, Khullar A, Chou S, Sacramo A, & Gerratana B (2009) Biosynthesis of sibiromycin, a  
565 potent antitumor antibiotic. *Appl. Environ. Microbiol.* 75(9):2869-2878.
- 566 7. Greening C, *et al.* (2017) Mycobacterial F<sub>420</sub>H<sub>2</sub>-dependent reductases promiscuously reduce  
567 diverse compounds through a common mechanism. *Frontiers in microbiology* 8:1000.
- 568 8. Ney B, *et al.* (2017) The methanogenic redox cofactor F 420 is widely synthesized by aerobic  
569 soil bacteria. *The ISME journal* 11(1):125.
- 570 9. Rinke C, *et al.* (2013) Insights into the phylogeny and coding potential of microbial dark  
571 matter. *Nature* 499(7459):431.
- 572 10. Wu D, *et al.* (2009) A phylogeny-driven genomic encyclopaedia of Bacteria and Archaea.  
573 *Nature* 462(7276):1056.
- 574 11. Spang A, *et al.* (2012) The genome of the ammonia-oxidizing Candidatus *Nitrososphaera*  
575 *gargensis*: insights into metabolic versatility and environmental adaptations. *Environmental*  
576 *microbiology* 14(12):3122-3145.
- 577 12. Gurumurthy M, *et al.* (2013) A novel F420-dependent anti-oxidant mechanism protects *M*  
578 *ycobacterium tuberculosis* against oxidative stress and bactericidal agents. *Mol. Microbiol.*  
579 87(4):744-755.
- 580 13. Jirapanjawan T, *et al.* (2016) The redox cofactor F420 protects mycobacteria from diverse  
581 antimicrobial compounds and mediates a reductive detoxification system. *Appl. Environ.*  
582 *Microbiol.* 82(23):6810-6818.
- 583 14. Purwantini E & Mukhopadhyay B (2013) Rv0132c of *Mycobacterium tuberculosis* encodes a  
584 coenzyme F420-dependent hydroxymycolic acid dehydrogenase. *PLoS one* 8(12):e81985.
- 585 15. Cellitti SE, *et al.* (2012) Structure of Ddn, the deazaflavin-dependent nitroreductase from  
586 *Mycobacterium tuberculosis* involved in bioreductive activation of PA-824. *Structure*  
587 20(1):101-112.
- 588 16. Mohamed A, *et al.* (2016) Protonation state of F420H<sub>2</sub> in the prodrug-activating deazaflavin  
589 dependent nitroreductase (Ddn) from *Mycobacterium tuberculosis*. *Mol. Biosyst.* 12(4):1110.
- 590 17. Lee BM, *et al.* (2019) The evolution of nitroimidazole antibiotic resistance in *Mycobacterium*  
591 *tuberculosis*. *bioRxiv*:631127.
- 592 18. Graham DE, Xu H, & White RH (2003) Identification of the 7, 8-didemethyl-8-hydroxy-5-  
593 deazariboflavin synthase required for coenzyme F 420 biosynthesis. *Arch. Microbiol.*  
594 180(6):455-464.
- 595 19. Graupner M & White RH (2001) Biosynthesis of the phosphodiester bond in coenzyme F420  
596 in the methanoarchaea. *Biochemistry* 40(36):10859-10872.
- 597 20. Grochowski LL, Xu H, & White RH (2008) Identification and characterization of the 2-  
598 phospho-L-lactate guanylyltransferase involved in coenzyme F420 biosynthesis. *Biochemistry*  
599 47(9):3033-3037.

- 600 21. Graupner M, Xu H, & White RH (2002) Characterization of the 2-phospho-L-lactate  
601 transferase enzyme involved in coenzyme F420 biosynthesis in *Methanococcus jannaschii*.  
602 *Biochemistry* 41(11):3754-3761.
- 603 22. Li H, Graupner M, Xu H, & White RH (2003) CofE catalyzes the addition of two glutamates to  
604 F420-O in F420 coenzyme biosynthesis in *Methanococcus jannaschii*. *Biochemistry*  
605 42(32):9771-9778.
- 606 23. Nocek B, *et al.* (2007) Structure of an amide bond forming F420:  $\gamma\gamma$ -glutamyl ligase from  
607 *Archaeoglobus fulgidus*-a member of a new family of non-ribosomal peptide synthases. *J.*  
608 *Mol. Biol.* 372(2):456-469.
- 609 24. Bashiri G, *et al.* (2019) A revised biosynthetic pathway for the cofactor F 420 in prokaryotes.  
610 *Nat. Commun.* 10(1):1558.
- 611 25. Forouhar F, *et al.* (2008) Molecular insights into the biosynthesis of the F420 coenzyme. *J.*  
612 *Biol. Chem.* 283(17):11832-11840.
- 613 26. Braga D, *et al.* (2019) Metabolic Pathway Rerouting in *Paraburkholderia rhizoxinica* Evolved  
614 Long-Overlooked Derivatives of Coenzyme F420. *ACS Chem. Biol.*
- 615 27. Bair TB, Isabelle DW, & Daniels L (2001) Structures of coenzyme F<sub>420</sub> in *Mycobacterium*  
616 species. *Arch. Microbiol.* 176(1-2):37-43.
- 617 28. Bashiri G, *et al.* (2016) Elongation of the poly- $\gamma$ -glutamate tail of F420 requires both domains  
618 of the F420:  $\gamma$ -glutamyl ligase (FbiB) of *Mycobacterium tuberculosis*. *J. Biol. Chem.*  
619 291(13):6882-6894.
- 620 29. Krissinel E & Henrick K (2007) Inference of macromolecular assemblies from crystalline state.  
621 *Journal of molecular biology* 372(3):774-797.
- 622 30. Grinter R, Roszak AW, Cogdell RJ, Milner JJ, & Walker D (2012) The crystal structure of the  
623 lipid II-degrading bacteriocin syringacin M suggests unexpected evolutionary relationships  
624 between colicin M-like bacteriocins. *Journal of Biological Chemistry* 287(46):38876-38888.
- 625 31. Knape MJ, *et al.* (2015) Divalent metal ions Mg<sup>2+</sup> and Ca<sup>2+</sup> have distinct effects on protein  
626 kinase A activity and regulation. *ACS chemical biology* 10(10):2303-2315.
- 627 32. Braga D, *et al.* (2019) Metabolic pathway rerouting in *Paraburkholderia rhizoxinica* evolved  
628 long-overlooked derivatives of coenzyme F420. *bioRxiv*:670455.
- 629 33. Fothergill-Gilmore LA & Michels PA (1993) Evolution of glycolysis. *Progress in biophysics and*  
630 *molecular biology* 59(2):105-235.
- 631 34. Shi K, *et al.* (2018) T4 DNA ligase structure reveals a prototypical ATP-dependent ligase with  
632 a unique mode of sliding clamp interaction. *Nucleic acids research* 46(19):10474-10488.
- 633 35. Haver HL, *et al.* (2015) Mutations in genes for the F420 biosynthetic pathway and a  
634 nitroreductase enzyme are the primary resistance determinants in spontaneous in vitro-  
635 selected PA-824-resistant mutants of *Mycobacterium tuberculosis*. *Antimicrob. Agents*  
636 *Chemother.* 59(9):5316-5323.
- 637 36. Cashmore TJ, *et al.* (2017) Identification of a membrane protein required for lipomannan  
638 maturation and lipoarabinomannan synthesis in *Corynebacterineae*. *J. Biol. Chem.*  
639 292(12):4976-4986.
- 640 37. Bashiri G, Rehan AM, Greenwood DR, Dickson JM, & Baker EN (2010) Metabolic engineering  
641 of cofactor F420 production in *Mycobacterium smegmatis*. *PLoS ONE* 5(12):e15803.
- 642 38. Tropea JE, Cherry S, & Waugh DS (2009) Expression and purification of soluble His 6-tagged  
643 TEV protease. *High throughput protein expression and purification*, (Springer), pp 297-307.
- 644 39. Kabsch W (2010) XDS. *Acta Crystallogr. Sect. D.* 66(2):125-132.
- 645 40. Winn MD, *et al.* (2011) Overview of the CCP4 suite and current developments. *Acta*  
646 *Crystallographica Section D: Biological Crystallography* 67(4):235-242.
- 647 41. Adams PD, *et al.* (2010) PHENIX: a comprehensive Python-based system for macromolecular  
648 structure solution. *Acta Crystallogr. Sect. D.* 66(2):213-221.
- 649 42. Emsley P, Lohkamp B, Scott WG, & Cowtan K (2010) Features and development of Coot. *Acta*  
650 *Crystallogr. Sect. D.* 66(4):486-501.

- 651 43. Long F, *et al.* (2017) AceDRG: a stereochemical description generator for ligands. *Acta*  
652 *Crystallographica Section D: Structural Biology* 73(2):112-122.
- 653 44. Stoessel D, *et al.* (2016) Metabolomics and lipidomics reveal perturbation of sphingolipid  
654 metabolism by a novel anti-trypanosomal 3-(oxazolo [4, 5-b] pyridine-2-yl) anilide.  
655 *Metabolomics* 12(7):126.

656

657

658 Figures

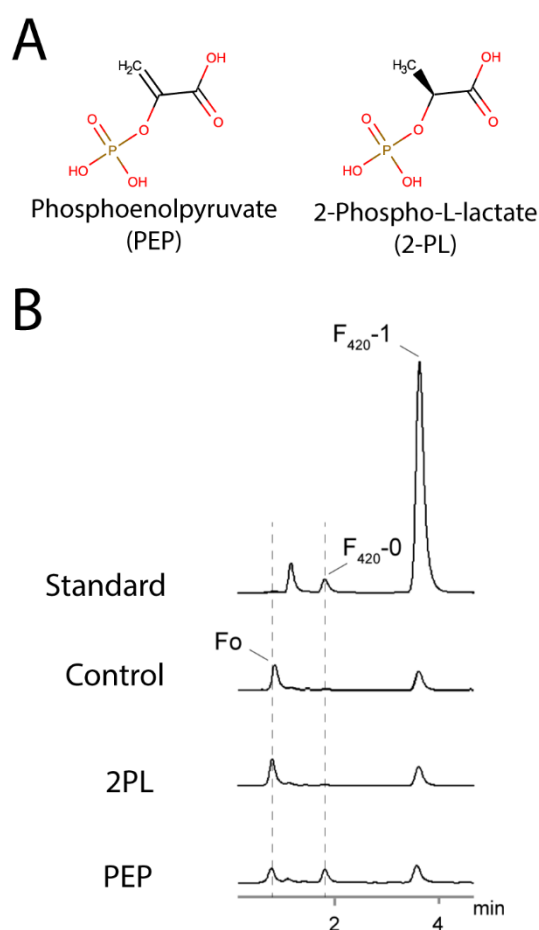

659

660 **Figure 1 PEP but not 2PL stimulates DH-F<sub>420</sub>-O synthesis in *M. smegmatis* cell lysates.** (A) 2D  
661 structures of PEP and 2PL demonstrating the difference (double bond or single bond) in  
662 bonding between carbon 2 and 3. (B) Fluorescence emission detection chromatogram from  
663 HPLC of *M. smegmatis* lysates spiked with either 2PL, PEP or an unspiked control. Synthesis of  
664 a species with characteristic F<sub>420</sub> fluorescence (Ex: 420 nm, Em:480 nm) corresponding to F<sub>420</sub>-  
665 0 from the purified standard was only detected in the PEP-spiked lysate. The appearance of  
666 this F<sub>420</sub>-O-like species coincided with a decrease in the presence of Fo, suggesting that PEP is  
667 the precursor for F<sub>420</sub> synthesis in *M. smegmatis* in cells. F<sub>420</sub>-1 in the standard corresponds to  
668 F<sub>420</sub> with a single glutamate moiety.

669

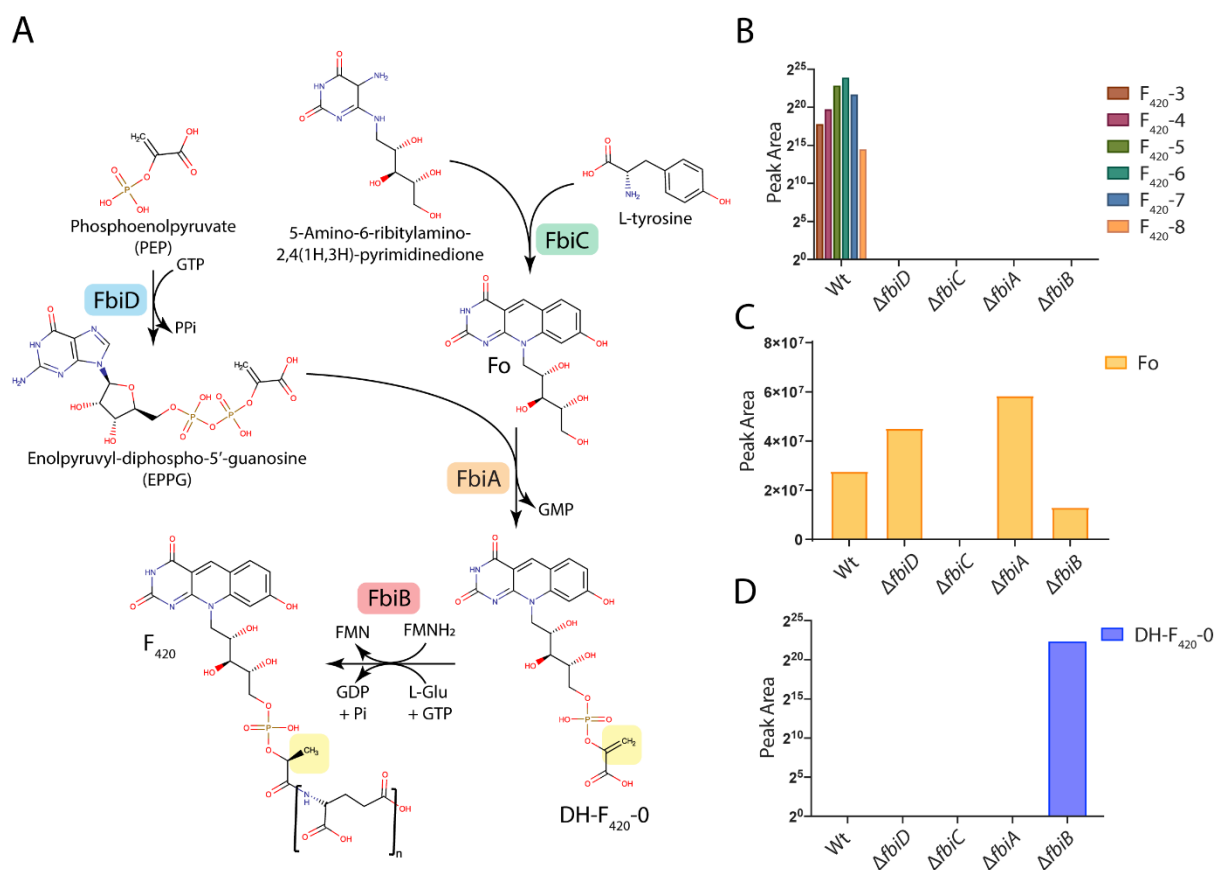

670

671 **Figure 2 Mutagenic dissection of the F<sub>420</sub> biosynthesis pathway in *M. smegmatis* reveals DH-**

672 **F<sub>420</sub>-0 is the biosynthetic intermediate in mycobacteria. (A) A schematic of the F<sub>420</sub>**

673 **biosynthesis pathway in *M. smegmatis* with PEP, rather than 2PL, utilised by FbiD to create**

674 **the reaction intermediate EPPG. The enzymes responsible for catalytic steps are shown,**

675 **along with the 2D-structures of proposed pathway intermediates and mature F<sub>420</sub>. The yellow**

676 **box highlights the reduction of DH-F<sub>420</sub>-0, proposed to be mediated by the C-terminal domain**

677 **of FbiB using FMNH<sub>2</sub>. LC-MS detection of mature F<sub>420</sub> species (B), Fo (C) and DH-F<sub>420</sub>-0 (D) in**

678 ***M. smegmatis* cell lysates of wildtype and F<sub>420</sub> biosynthesis pathway mutants confirming the**

679 **proposed function of the F<sub>420</sub> biosynthetic genes detecting the novel intermediate DH-F<sub>420</sub>-0**

680 **in whole cells. F<sub>420</sub>-X species in panel B correspond to different lengths of the poly-glutamate**

681 **chain where X = n tail length.**

682



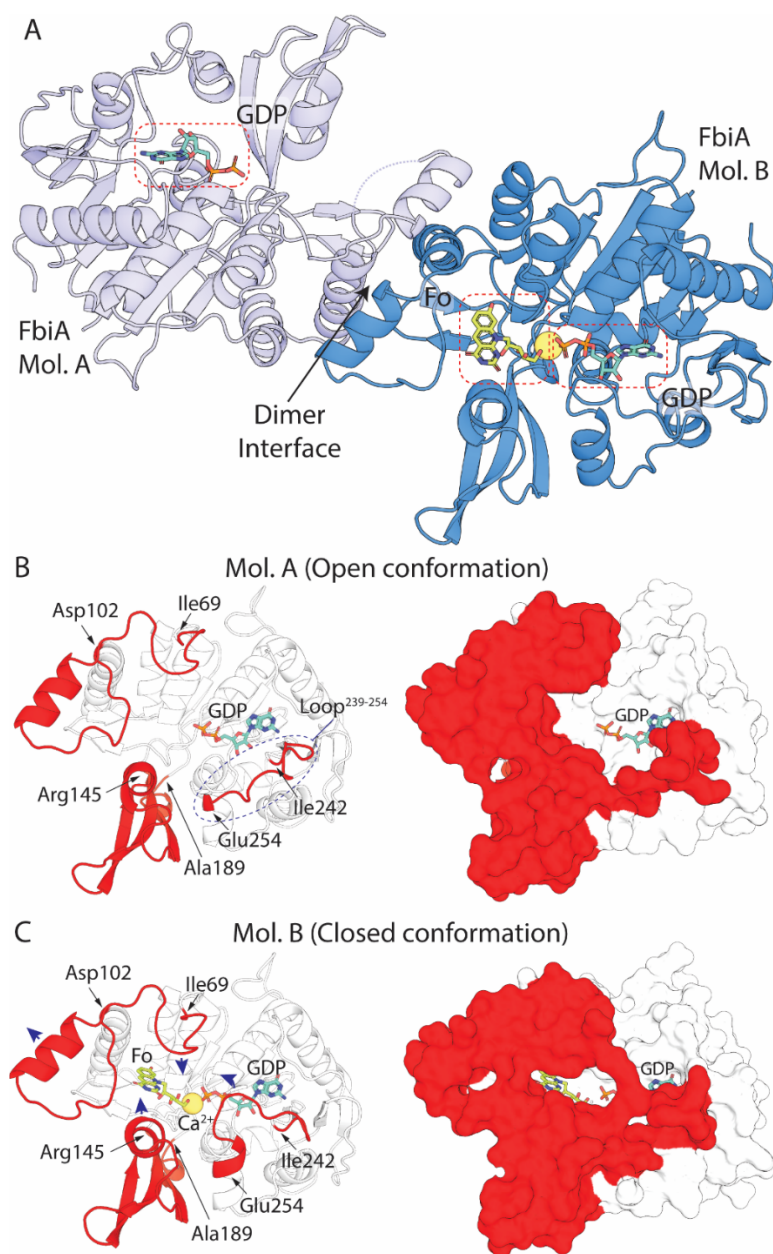

683

684 **Figure 3** The crystal structure of FbiA captures the enzyme in open and closed states. (A) The  
685 crystal structure of FbiA from *M. smegmatis* in complex with Fo and GDP. FbiA is shown as a  
686 cartoon representation with Mol. B colored in sky blue and Mol. A colored in light blue. GDP  
687 and Fo are shown as a stick representation and  $\text{Ca}^{2+}$  is shown as a yellow sphere. (B) Mol. A  
688 from the FbiA structure exists in an open conformation. Left shows Mol. A as a cartoon with  
689 loops and subdomains which differ in conformation in Mol. B highlighted in red. Right shows  
690 Mol. A as a surface representation with mobile regions highlighted in red. (C) Mol. B. of FbiA  
691 structure exists in a closed 'catalytically ready' state. Left is displayed as panel B, with the  
692 direction of movement of loops compared to Mol. A shown with blue arrows. Right shows  
693 Mol. B as in panel B, demonstrating how the mobile regions enclose the FbiA active site.

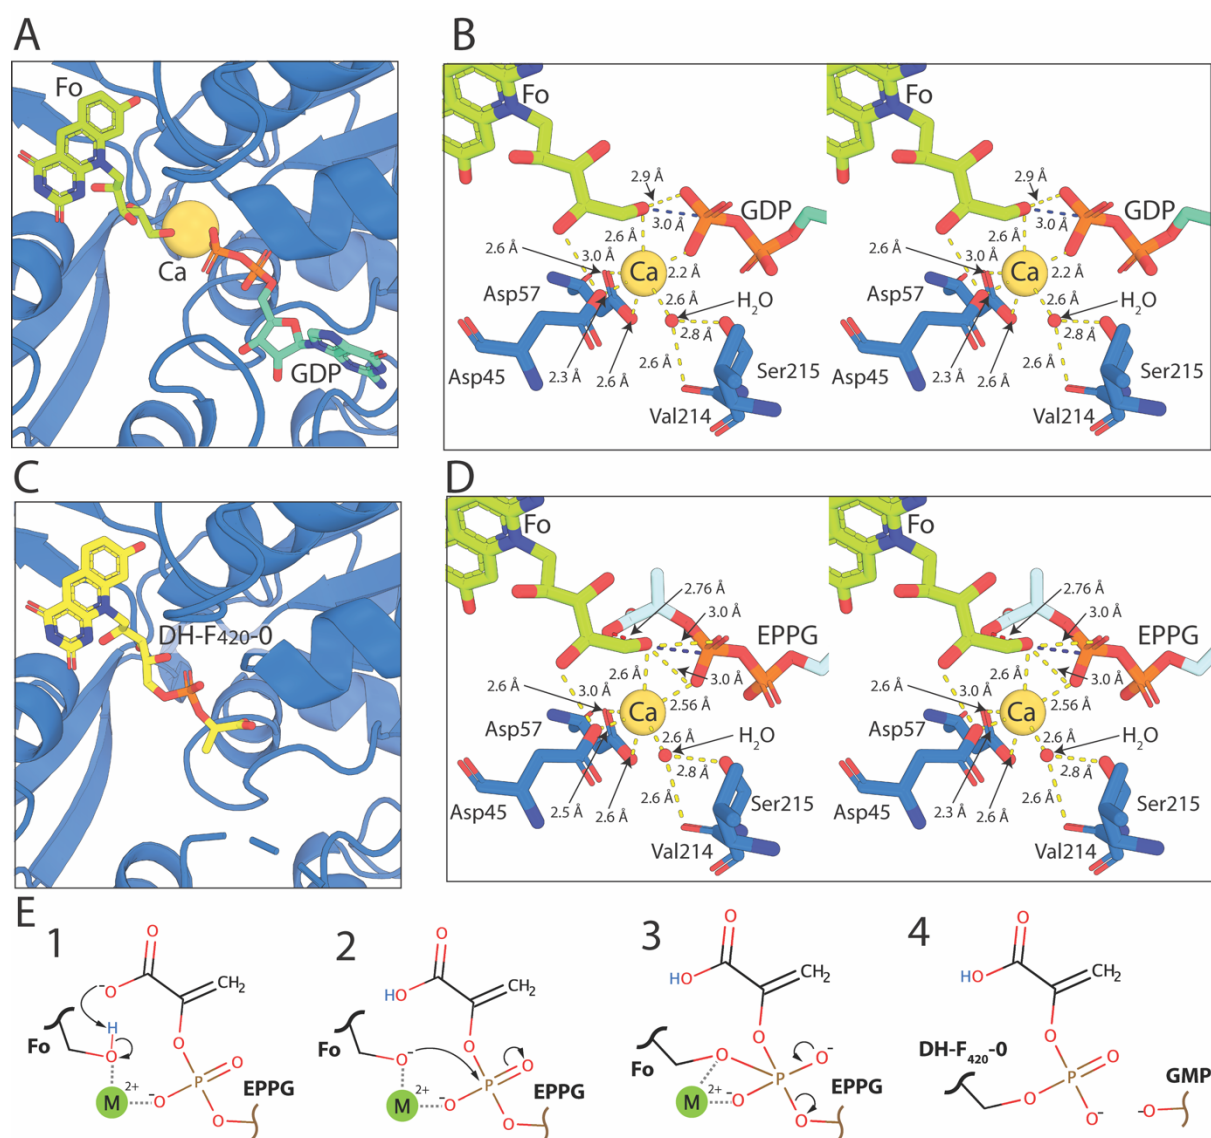

695 **Figure 4 Resolution of the structure of FbiA in the presence of Fo, GDP and DH-F<sub>420</sub>-O**  
 696 **provides insight into its catalytic mechanism.** (A) Fo and GDP in complex with Mol. B of FbiA  
 697 in coordination with the catalytic Ca<sup>2+</sup> ion. FbiA is shown as a sky-blue cartoon, Fo and GDP as  
 698 sticks and Ca<sup>2+</sup> as a sphere. (B) A stereoview of the catalytic center of the FbiA active site in  
 699 complex with Fo and GDP, showing FbiA sidechains involved in coordinating the catalytic  
 700 metal ion and a coordinating H<sub>2</sub>O molecule. Bond distances <math>< 3.2 \text{ \AA}</math> are shown as yellow  
 701 dashed lines, the distance between the terminal OH of Fo and P of the  $\beta$ -phosphate of GDP is  
 702 highlighted in blue. (C) DH-F<sub>420</sub>-O in complex with FbiA, shown as in panel A. (D) A stereoview  
 703 of the FbiA catalytic centre with the reaction substrate EPPG model in place of GDP displayed  
 704 in panel C, with the close proximity between the carboxylic acid group of EPPG and the  
 705 terminal OH of Fo highlighted with a red dashed line. (E) A schematic showing the proposed  
 706 catalytic mechanism for the formation of DH-F<sub>420</sub>-O by FbiA.
